# Supplementary material for: Structural mechanisms for α-conotoxin activity at the human α3β4 nicotinic acetylcholine receptor
Source: PubMed Central journal article supplement (PMC5374441; doi:10.1038/srep45466), 2017-03-31
Supplement: srep45466-s1.pdf [file srep45466-s1.pdf]

**Structural mechanisms for  $\alpha$ -conotoxin activity at the human  $\alpha 3\beta 4$  nicotinic acetylcholine receptor**

**Nikita Abraham, Michael Healy, Lotten Ragnarsson, Andreas Brust,  
Paul Alewood, Richard Lewis\***

## Supplementary information

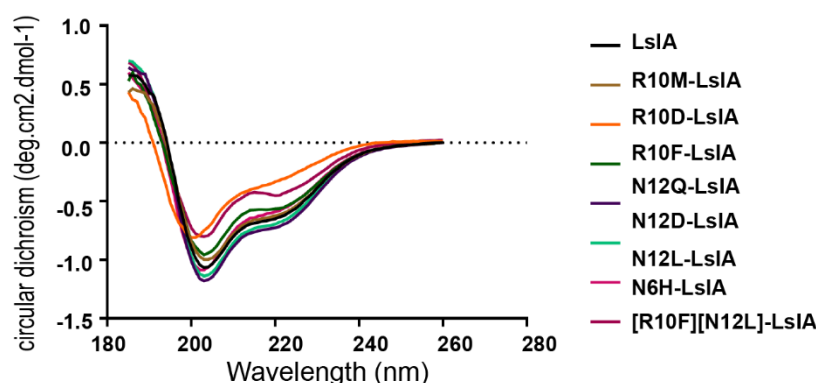

**Supplementary figure S1: CD spectra for synthetic LsIA analogues.** LsIA analogues with modifications to position 6, 10 and 12 were chemically synthesised. R10M, R10D and R10F were synthesised as analogues of position 10. N12Q, N12D and N12L as analogues for position 12. CD spectra for LsIA analogues confirmed that all the analogues preserved the  $\alpha$ -helical fold, similar to the native peptide with the exception of R10D-LsIA where the peak at 222 nm was shallower and the peak at 204 nm shifted to 200 nm as compared to LsIA. Suggesting that R10D-LsIA conformation might differ from the conformation of native LsIA, possibly due to global structural changes in the peptide induced by this modification.

|              |                                                                                         |     |
|--------------|-----------------------------------------------------------------------------------------|-----|
| Ls-AChBP     | -----LDRADILYNIHQTSRPDVIPTQRDRPVAVSVSLKFINILEVNEITNEVDV                                 | 50  |
| h $\alpha$ 3 | -----AEHRLF <b>ER</b> LF--EDYNEIIRPVANVSDPVI <b>I</b> HFEVSMSQLVKVDEVNQIMET             | 50  |
| r $\alpha$ 3 | -----AEHRLF <b>QY</b> LF--EDYNEIIRPVANVSH <b>PV</b> II <b>Q</b> FEVSMSQLVKVDEVNQIMET    | 50  |
|              |                                                                                         |     |
| Ls-AChBP     | VFWQQTTWSDRTLAWNSSHSP--DQVSVPISSLWVPDLAAY <b>N</b> NAIS-KPEVLTQPQLARVVS                 | 107 |
| h $\alpha$ 3 | NLWLKQIWNDYKLLK <b>W</b> NPSDY <b>GGA</b> EFMRVPAQKIWKPDIVLY <b>N</b> NAVGFQVDDKTKALLKY | 110 |
| r $\alpha$ 3 | NLWLKQIWNDYKLLK <b>K</b> PSDY <b>QGV</b> EFMRVPAEKIWKPDIVLY <b>N</b> NADGDFQVDDKTKALLKY | 110 |
|              |                                                                                         |     |
| Ls-AChBP     | DGEVLYMPSIRQRFSCDVSQVD-TESGATCRIKIG <b>SWT</b> HHSREISVDPTTENSDDSEYFS                   | 166 |
| h $\alpha$ 3 | TGEVTWIPPAIFKSSCKIDVTYFPFDYQNTMKFG <b>SWS</b> YDKAKIDLVLIGSSMNLKDYW-                    | 169 |
| r $\alpha$ 3 | TGEVTWIPPAIFKSSCKIDVTYFPFDYQNTMKFG <b>SWS</b> YDKAKIDLVLIGSSMNLKDYW-                    | 169 |
|              |                                                                                         |     |
| Ls-AChBP     | QYSRFEILDVTVQKKNVTV <b>YSCCEIAY</b> EDVEVSLNFRKKGRSEIL- 210                             |     |
| h $\alpha$ 3 | ESGEWAIKAPGYKH <b>DIKYNCC</b> <b>E</b> I <b>Y</b> PDITYSLYIRRLPLFYTI- 214               |     |
| r $\alpha$ 3 | ESGEWAIKAPGYKH <b>EIKYNCC</b> <b>E</b> I <b>Y</b> QDITYSLYIRRLPLFYTI- 213               |     |

**Supplementary figure S2: Sequence alignment for the human and rat  $\alpha$ 3 subunit ligand binding domain.** The human (Uniprot: P32297) and rat (Uniprot: P04757)  $\alpha$ 3 are aligned with the Ls-AChBP. The  $\alpha$ 3 subunit from the two species share 95% sequence identity with an E value of  $1 \times 10^{-150}$ . The residues varying between the two species are highlighted in red. The residues participating in receptor-ligand interactions are bold with grey back ground.

|          |                                                                                       |     |
|----------|---------------------------------------------------------------------------------------|-----|
| Ls-AChBP | ----LDRADILYNIRQTSRDPVIPTQRDRPVAVSVSLKFINILEVNEITNEVDVVF <sup>W</sup> QQT             | 56  |
| hβ2      | TDTEERLVEHLLDPSRYNKLIRPATNGSELVTVQLMVSLAQLISVHEREQIMTTNV <sup>W</sup> L <sup>TQ</sup> | 60  |
| rβ2      | --TEERLVEHLLDPSRYNKLIRPATNGSELVTVQLMVSLAQLISVHEREQIMTTNV <sup>W</sup> L <sup>TQ</sup> | 58  |
| Ls-AChBP | TWSDRTLAWNSSHSP--DQVSVPISSLWVPDLAAYNAIS-KPEVLTPQLARVVSDGEVLY                          | 113 |
| hβ2      | EWEDYRLTWKPEEFDNMKKVRLPSKHIWLPDVVLYNNADGMYEVSFYSNAVWSYDGSIF <sup>W</sup>              | 120 |
| rβ2      | EWEDYRLTWKPEEFDNMKKVRLPSKHIWLPDVVLYNNADGMYEVSFYSNAVWSYDGSIF <sup>W</sup>              | 118 |
| Ls-AChBP | MPSIRQRFSCDVSGVD-TESGATCRIKIGSWTHHSREISVDPTTENSDDSEYFSQYSRFE                          | 172 |
| hβ2      | LPPAIYKSACKIEVKHFPPDQQNCTMKFRSWTYDRTEIDLVLKSEVASLDDFTP-SGEWD                          | 179 |
| rβ2      | LPPAIYKSACKIEVKHFPPDQQNCTMKFRSWTYDRTEIDLVLKSEVASLDDFTP-SGEWD                          | 177 |
| Ls-AChBP | ILDVTQKKNSVTYSCCPE-AYEDVEVSLNFRKKGRSEIL--                                             | 210 |
| hβ2      | IIVALPGRRNENPD----DSTYVDITYDFIIRKPLFYTI-                                              | 214 |
| rβ2      | IIVALPGRRNENPD----DSTYVDITYDFIIRKPLFYTI-                                              | 207 |

**Supplementary figure S3: Sequence alignment for the human and rat β2 subunit ligand binding domain.** The human (Uniprot: P11787) and rat (Uniprot: P12390) β2 are aligned with the Ls-AChBP. The β2 subunit from the two species share 99% sequence identity with an E value of  $2 \times 10^{-158}$ . The residues participating in receptor-ligand interactions are highlighted with grey back ground.

|          |                                                                                                                              |     |
|----------|------------------------------------------------------------------------------------------------------------------------------|-----|
| Ls-AChBP | ---LDRADILYNIRQTSRDPVIPTQRDRPVAVSVSLKFINILEVNEITNEVDVVF <sup>W</sup> QQT                                                     | 57  |
| hβ4      | -AEEKLMDLLNKTRYNNLIRPATSSSSQLISIKLQLSLAQLISVNEREQIMTTNV <sup>W</sup> LKQE                                                    | 59  |
| rβ4      | -AEEKLMDLLNKTRYNNLIRPATSSSSQLISIRLELSLSQLISVNEREQIMTT <sup>SI</sup> W <sup>L</sup> KQE                                       | 59  |
| Ls-AChBP | WSDRTLAWNSSHSP--DQVSVPISSLWVPDLAAYNAIS-KPEVLTPQLARVVSDGEVLYM                                                                 | 114 |
| hβ4      | WTDYRLTWNSSRYEGVNLIRIPAKR <sup>I</sup> WLPDIVLYNNADGTYEVS <sup>V</sup> YTN <sup>L</sup> IVRSNGSV <sup>L</sup> W <sup>L</sup> | 119 |
| rβ4      | WTDYRLAWNSSCYEGVNLIRIPAKR <sup>V</sup> WLPDIVLYNNADGTYEVS <sup>V</sup> YTN <sup>V</sup> IVRSNGSI <sup>Q</sup> W <sup>L</sup> | 119 |
| Ls-AChBP | PSIRQRFSCDVSGVD-TESGATCRIKIGSWTHHSREISVDPTTENSDDSEYFSQYSRFEI                                                                 | 173 |
| hβ4      | PPAIYKSACKIEVK <sup>Y</sup> FPPDQQNCTLKFRSWTYDHTEIDMVL <sup>MT</sup> PTAS <sup>MD</sup> FTP-SGEWDI                           | 178 |
| rβ4      | PPAIYKSACKIEVK <sup>H</sup> FPPDQQNCTLKFRSWTYDHTEIDMVL <sup>KS</sup> PTA <sup>I</sup> MD <sup>D</sup> FTP-SGEWDI             | 178 |
| Ls-AChBP | ILDVTQKKNSVTYSCCPE-AYEDVEVSLNFRKKGRSEIL--                                                                                    | 210 |
| hβ4      | VALPGRRTVNPQ----DPSYVDVITYDFIIRKPLFYTI                                                                                       | 212 |
| rβ4      | VALPGRRTVNPQ----DPSYVDVITYDFIIRKPLFYTI                                                                                       | 212 |

**Supplementary figure S4: Sequence alignment for the human and rat β4 subunit ligand binding domain.** The human (Uniprot: P30926) and rat (Uniprot: P12392) β4 are aligned with the Ls-AChBP. The β4 subunit from the two species share 93% sequence identity with an E value of  $4 \times 10^{-154}$ . The residues varying between the two species are highlighted in red. The residues participating in receptor-ligand interactions are highlighted in grey back ground.

```

Ls-AChBP      --LDR---ADILYNIRQTSRPDVIPTQRDRPVAVSVSLKFINILEVNEITNEVDVVFWQO 55
hα7           GEFQRKLYKELVKYNPLERP---VANDSQPLTVYFSLSLLQIMDVDEKNQVLTTNIWLQ 57
rα7           GEFQRRLYKELVKYNPLERP---VANDSQPLTVYFSLSLLQIMDVDEKNQVLTTNIWLQ 57

Ls-AChBP      TTWSDRTLAWNSSHSP--DQVSVPISSLWVPDLAAYNAIS-KPEVLTPQLARVVDGEVL 112
hα7           MSWTDHYLQWNVSEYPGVKTVRFPDQGIWKPDILLYNSADERFDATFHTNVLVNSSGHCQ 117
rα7           MSWTDHYLQWNMSEYPGVKNVRFPDQGIWKPDILLYNSADERFDATFHTNVLVNASGHCQ 117

Ls-AChBP      YMPSIRQRFSCDVSGV-DTESGATCRIKIGSWTHHSREISVDPTTENSDDSEYFSQYSRF 171
hα7           YLPPGIFKSSCYIDVRWFPPDVQHCKLKFGSWSYGGWSLDLQM--QEADISGYIP-NGEW 174
rα7           YLPPGIFKSSCYIDVRWFPPDVQQCKLKFGSWSYGGWSLDLQM--QEADISSYIP-NGEW 174

Ls-AChBP      EILDVTQKKNSVTYSCCPEAYEDVEVSLNFRKKGRSEIL 210
hα7           DLVGIPGKRSERFYECCKEPYPDVTFTVTMRRRT----- 208
rα7           DLMGIPGKRNEKFYECCKEPYPDVTYTVTMRRRT----- 208

```

**Supplementary figure S5: Sequence alignment for the human and rat  $\alpha 7$  subunit ligand binding domain.** The human (Uniprot: P30926) and rat (Uniprot: P12392)  $\alpha 7$  are aligned with the Ls-AChBP. The  $\alpha 7$  subunit from the two species share 95% sequence identity with an E value of  $5 \times 10^{-156}$ . The residues varying between the two species are highlighted in red. The residues participating in receptor-ligand interactions are highlighted in bold with grey back ground (residues of the principle face) and in *italics* with grey background (residues of the complimentary face).

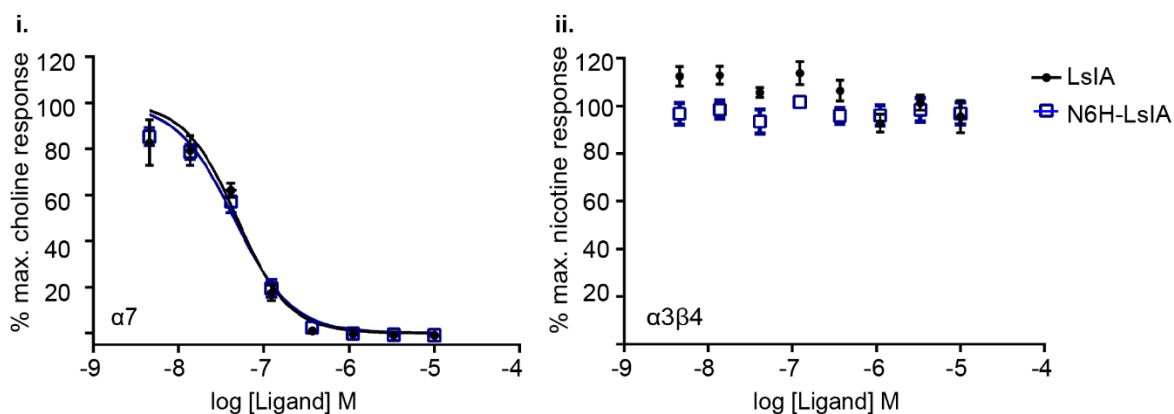

**Supplementary figure S6: Characterisation of LsIA-N6H analogue.** A histidine residue at position 6 is a common feature for  $\alpha$ -conotoxins that antagonise the  $\alpha 3\beta 4$  nAChR. LsIA N6 was substituted with histidine. The N6H analogue had a functional profile similar to LsIA at  $\alpha 7$  and  $\alpha 3\beta 4$  subtypes. This suggests that the histidine residue is not critical for the activity and selectivity of antagonists at the  $\alpha 3\beta 4$  nAChR.

|                 |                                                                       |    |     |
|-----------------|-----------------------------------------------------------------------|----|-----|
| <b>Ls-AChBP</b> | -----LDRADILYNIHQTSRPDVIPTQRDRPVAVSVSLKFINILEVNEITNEVDVVF             | WQ | 54  |
| Ac-AChBP        | HSQANLMRLKSDLFN----RSPMPGPTKDDPLTVTLGFTLQDIVKADSSSTNEVDLVYYE          |    | 56  |
| h $\alpha$ 7    | ----FQRKLYKELV--KNYNPLERPVANDSQPLTVYFSLSLQIMDVDEKNQVLTNI              | WL | 54  |
| h $\alpha$ 3    | ----AEHRLFERLF--EDYNEIIRPVANVSDPVIHFEVSMSQLVKVDEVNQIMETNLWL           |    | 54  |
| h $\beta$ 2     | --TDTEERLVEHLLDPSRYNKLIRPATNGSELVTVQLMVSLAQLISVHEREQIMTNNV            | WL | 58  |
| h $\beta$ 4     | ----AEEKLMDLLNKTRYNNLIRPATSSSQLISIKLQLSLAQLISVNEREQIMTNNV             | WL | 56  |
| <b>Ls-AChBP</b> | <b>*</b> QTTWSDRTLAWNSSHSP--DOVSVPISSSLWVPDLAAYNAIS-KPEVLTPQLARVSDGEV |    | 111 |
| Ac-AChBP        | QQRWKLNSLMWDPNEYGNITDEFRTSAADIWTPDITAYSSSTR-PVQVLSPQIAVWTHDGSV        |    | 115 |
| h $\alpha$ 7    | QMSWTDHYLQWNVSEYPGVKTVRFPPDQGIWKPDILLYNSADERFDATFHTNVLVNSSGHC         |    | 114 |
| h $\alpha$ 3    | KQIWNNDYKLLWNPSDYGGAEFMRVPAQKIWKPDIVLYNNAVGFQVDDKTKALLKYTGEV          |    | 114 |
| h $\beta$ 2     | TQEWEDYRLTWKPEEFDNMKVRRLPSKHIWLPDVVLYNNADGMYEVSFYNSNAVSYDGS           |    | 118 |
| h $\beta$ 4     | KQEWTDYRLTWNSSRYEGVNTLRLPAKRIWLPDIVLYNNADGTYEVSVYTNLTVRSNGSV          |    | 116 |
| <b>Ls-AChBP</b> | LYMPSIRQRFSCDVSQVD-TESGATCRIKIG <b>SWT</b> HHSREISVDPFTENSDDSEYFSQYSR |    | 170 |
| Ac-AChBP        | MEIPAQRLSFMCDPTGVD-SEEGATCAVKFG <b>SWV</b> YSGFEIDLKTDIDQVDLSYYA-SSK  |    | 173 |
| h $\alpha$ 7    | QYLPPGIFKSSCYIDVRWFPPFDVQHCKLKFG <b>SWS</b> YGGWSLDLQME--ADISGYIP-NGE |    | 171 |
| h $\alpha$ 3    | TWIPPAIFKSSCKIDVTYFFFDYQNCTMKFG <b>SWS</b> YDKAKIDLVLIGSSMNLKDYWE-SGE |    | 173 |
| h $\beta$ 2     | FWLPPAIYKSACKIEVKHFPPDQONCTMKFRSWTYDRTEIDLVLKSEVASLDDFTP-SGE          |    | 177 |
| h $\beta$ 4     | LWLPPAIYKSACKIEVKYFFPDQONCTLKFERSWTYDHTEIDMVLMTPTASMDFTP-SGE          |    | 175 |
| <b>Ls-AChBP</b> | FEILDVTQKKNSVT <b>YSCCPE</b> -AYEDVEVSLNFRKKGRSEIL-----               |    | 210 |
| Ac-AChBP        | YEILSATQTRQVQH <b>YSCCPE</b> -PYIDVNLVVKFRERRAGNGFFRNLF               |    | 219 |
| h $\alpha$ 7    | WDLVGIPGKRSERF <b>YECCKE</b> -PYPDVTFTVTMRRRT-----                    |    | 206 |
| h $\alpha$ 3    | WAIKAPGYKHDIK <b>YNCCEE</b> -IYPDITYSLYIRRLPLFYTI-----                |    | 214 |
| h $\beta$ 2     | WDIVALPGRRNENPD----DSTYVDITYDFIIRKPLFYTI-----                         |    | 214 |
| h $\beta$ 4     | WDIVALPGRRTVNPQ----DPSYVDVITYDFIIRKPLFYTI-----                        |    | 212 |

**Supplementary figure S7: Multiple sequence alignment of the Ac-, Ls-AChBPs, human  $\alpha$ 7,  $\alpha$ 3,  $\beta$ 2 and  $\beta$ 4 subunits.** The alignment highlights residues involved in receptor-ligand interactions. Principle side contacts are in bold with grey background. Complimentary side contacts are in italics with grey background. Residues involved in hydrogen bond are indicated with (\*), Residues not in direct contact, but are a part of the interacting surface are boxed.

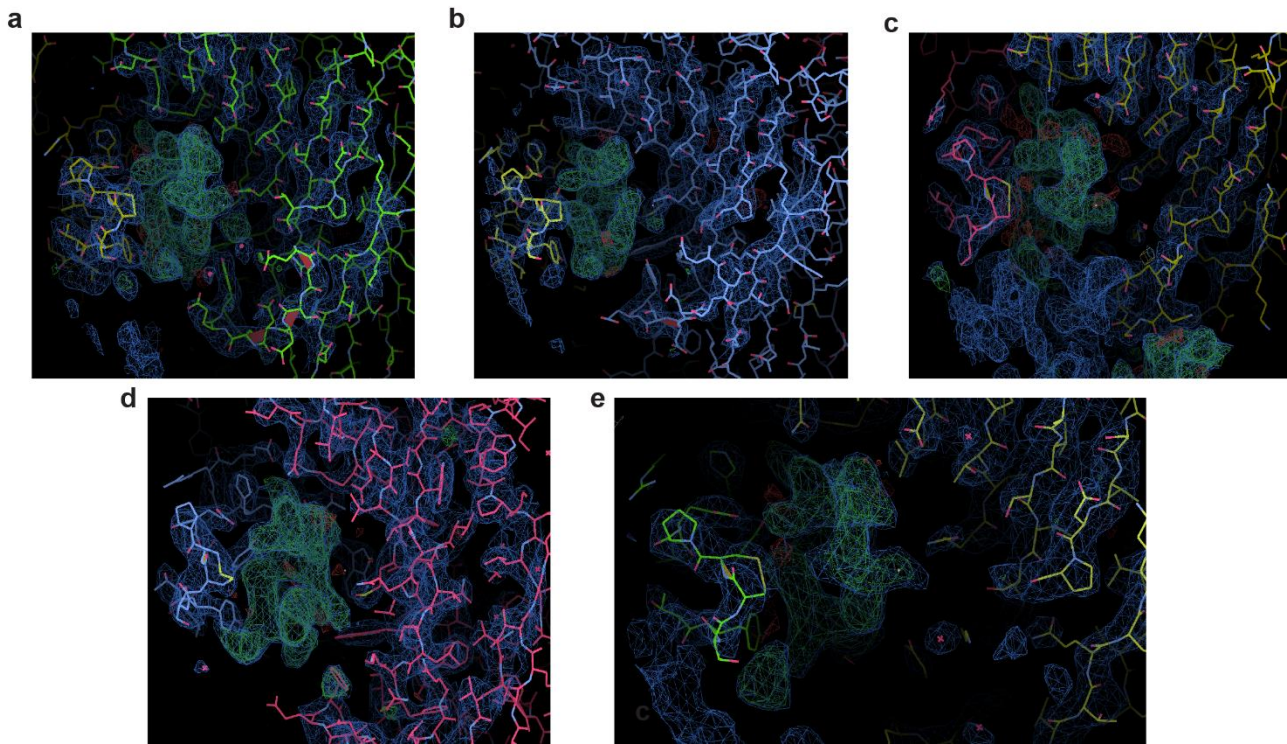

**Supplementary figure S8: Electron density maps of the LsIA/Ls-AChBP co-crystal structure.** Shown are the Fo-Fc ( $3.0 \sigma$ ) and 2Fo-Fc ( $1.0 \sigma$ ) maps for the co-crystal structure before peptide building. The ligand binding pocket shows clear electron density for LsIA. The five interfaces are shown as (a) Subunits A-E interface (b) Subunits B-D (c) Subunits C-A (d) Subunits D-C (e) Subunits E-B.

|              |                                                                |     |
|--------------|----------------------------------------------------------------|-----|
| Ls-AChBP     | -----LDRADILYNIRQTSRDPVIPTQRDRPVAVSVSLKFINILEVNEITNEV          | 48  |
| Ac-AChBP     | ---HSQANLMRLKSDLFN----RSPMPYGPPTKDDPLTVTLGFTLQDIVKADSSSTNEV    | 50  |
| h $\alpha$ 7 | -----FQRKLYKELV--KNYNPLERPVANDSQPLTVYFSLSLQIMDVDEKNQVL         | 48  |
| h $\beta$ 2  | -----TDTEERLVEHLLDPSRYNKLIRPATNGSELVTVQLMVSLAQLISVHEREQIM      | 52  |
| h $\beta$ 4  | -----AEEKLMDLLNKTRYNNLIRPATSSSQQLISIKLQLSLAQLISVNEREQIM        | 50  |
| h $\alpha$ 3 | -----AEHRLFERLF--EDYNEIIRPVANVSDPVI IHFEVSMSQLVKVDEVNQIM       | 48  |
| h $\alpha$ 4 | HVETRAHAERLLKRLF--SGYNKWSRPVANISDVVLVRFGLSIAQLIDVDEKNQMM       | 55  |
|              |                                                                |     |
| Ls-AChBP     | DVVFQQTTWSDRTLAWNSSHSP--DQVSVPISSLWVPDLAAYNAIS-KPEVLTPQLARV    | 105 |
| Ac-AChBP     | DLVYEEQQRWKLNSLMWDPNEYGNITDFRTSAADIWTPDITAYSSTR-PVQVLSQPQIAVV  | 109 |
| h $\alpha$ 7 | TTNIWLQMSWDTHYLQWNVSEYPGVKITVRFDPDGIWKPDILLNSADERFDATFHTNVTLV  | 108 |
| h $\beta$ 2  | TTNVWLTQEWEDYRLTWKPEEFDNMKKVRLPSKHIWLPDVVLYNNADGMYEVSFYSNAYV   | 112 |
| h $\beta$ 4  | TTNVWLTQEWEDYRLTWNSSRYEGVNI LRIPAKRIWLPDIVLYNNADGTVEVSVYTNLIV  | 110 |
| h $\alpha$ 3 | ETNLWLKQIWN DYK LKWNPSDYGGAEFMRVPAQKIWKPDIVLYNNAVGDVQVDDKTKALL | 108 |
| h $\alpha$ 4 | TTNVVVKQEWHDYKLRWDPADYENVTSIRIPSELIWRPDI VLYNNADGDFAVTHLTKAHL  | 115 |
|              |                                                                |     |
| Ls-AChBP     | VSDGEVLYMPSIRQRFSCDVSGVD-TESGATCRIKIGSWTHHSREISVDPTTENSDDSEY   | 164 |
| Ac-AChBP     | THDGSVMFIPAQRLSFMCDPTGVD-SEEGATCAVKFGSWVYSGFEIDLKTDTDQVDLSSY   | 167 |
| h $\alpha$ 7 | NSSGHCQYLPPGIFKSSCYIDRWFPPFDVQHCKIKFGSWSYGGWSLDLQMQE--ADISGY   | 165 |
| h $\beta$ 2  | SYDGSIFWLP PAIYKSACKIEVKHFPFDQQNCTMKFRSWTYDRTEIDLVLKSEVASLDDF  | 171 |
| h $\beta$ 4  | RSNGSVLWLPPAIYKSACKIEVKYFPFDQQNCTLKRFSWTYDHT EIDMVLMTPTASMDDF  | 169 |
| h $\alpha$ 3 | KYTGEVTVIPPAIFKSSCKIDVTYFPFDYQNC TMKFGSWSYDKAKIDLVLIGSSMNLKDY  | 167 |
| h $\alpha$ 4 | FHDGRVQWTPPAIYKSSCSIDVTFPPFDQQNCTMKFGSWTYDKAKIDLVMHRSRVDQLDF   | 174 |
|              |                                                                |     |
| Ls-AChBP     | FSQYSRFEILDVTQKKN SVTYSCPEAYEDVEVSLNFRKKGRSEIL-                | 210 |
| Ac-AChBP     | YA-SSKYEILSATQTRQVQHYSCCPE-PYIDVNLVVKFRERRAGNGF                | 213 |
| h $\alpha$ 7 | IP-NGEIDLVGIPGKRSERFYECCKEYPDVTFVTMRRRT-----                   | 206 |
| h $\beta$ 2  | TP-SGEWDIVALPGRRNENPD---DSTYVDITYDFIIRRKPLFYTI-                | 214 |
| h $\beta$ 4  | TP-SGEWDIVALPGRRTVNPO---DPSYVDVITYDFIIRRKPLFYTI-               | 212 |
| h $\alpha$ 3 | WE-SGEWAI IKAPGYKHDIKYNCCEIY PDITYSLYIRRLPLFYTIN               | 214 |
| h $\alpha$ 4 | WE-SGEWIVDAVGTYNTRKYECCEAIY PDITYAFVIRRLPLFYTIN                | 221 |

**Supplementary figure S9: Residues modulating  $\alpha$ -conotoxin activity at nAChRs.** Residues influencing  $\alpha$ -conotoxin activity at the  $\alpha$ 7<sup>1</sup> (green),  $\alpha$ 3 $\beta$ 2<sup>1,2</sup> (yellow),  $\alpha$ 4 $\beta$ 2<sup>3,4</sup> (bold) and  $\alpha$ 3 $\beta$ 4<sup>this study</sup> (blue) are shown. Distinct sets of residues influence  $\alpha$ -conotoxin activity at the different subtypes. A comparison of residues equivalent to the  $\alpha$ 3 $\beta$ 4 pharmacophore in other nAChRs (boxed) reveal some sequence variations. Therefore, in addition to being primary determinants of  $\alpha$ 3 $\beta$ 4 activity, the  $\beta$ 4 triad identified is likely to influence the selectivity of  $\alpha$ -conotoxins for different nAChR subtypes.

**Supplementary Table S1: Data collection and refinement statistics.**

|                          | <b>Ls-AChBP - LsIA</b>                       |
|--------------------------|----------------------------------------------|
| <b>Data collection</b>   |                                              |
| Space group              | C 2 2 2 <sub>1</sub>                         |
| Cell dimensions, Å       | a=115.8Å, b=124.5Å, c=154.2Å                 |
| Cell dimensions, °       | $\alpha=90^0$ , $\beta=90^0$ , $\gamma=90^0$ |
| Resolution, Å            | 51.40-2.80 (2.95 - 2.80)                     |
| Rsym                     | 0.137 (0.934)                                |
| <i>I</i> / $\sigma$      | 14.6 (2.6)                                   |
| Completeness (%)         | 96.9 (90.7)                                  |
| Multiplicity             | 11.4 (11.2)                                  |
| Total no. of reflections | 306906 (40559)                               |
| Unique reflections       | 26929 (3618)                                 |
| <b>Refinement</b>        |                                              |
| Resolution, Å            | 48.44-2.8                                    |
| Rwork/Rfree              | 0.2176 / 0.2451                              |
| rmsd bond distance, Å    | 0.008                                        |
| rmsd bond angle, Å       | 1.06                                         |
| Average B-factor         | 70.0                                         |



**Supplementary table S2: Receptor-ligand interactions seen in LsIA/Ls-AChBP co-crystal structure.**

| LsIA         | Ls AChBP                        |                                               |
|--------------|---------------------------------|-----------------------------------------------|
|              | Principal subunit (+)           | Complimentary subunit (-)                     |
| <b>Ser1</b>  | Ser186#* Cys187*                |                                               |
| <b>Gly2</b>  | <b>Tyr185#</b>                  |                                               |
| <b>Cys3</b>  | Cys187 Cys188                   | -                                             |
| <b>Cys4</b>  |                                 | <b>Tyr164*#</b>                               |
| <b>Ser5</b>  |                                 | Glu163#*                                      |
| <b>Asn6</b>  | <b>Tyr185#</b>                  |                                               |
| <b>Pro7</b>  | Tyr89* Trp143                   | Trp53* Met114*                                |
| <b>Ala8</b>  | <b>Tyr192#</b> Ser142<br>Trp143 |                                               |
| <b>Cys9</b>  | Cys187 Cys188<br>Tyr192#        |                                               |
| <b>Arg10</b> |                                 | <b>Tyr164*</b> Ser32* <b>Gln55*</b><br>Lys34* |
| <b>Val11</b> |                                 | Leu112                                        |
| <b>Asn12</b> | <b>Thr144* (backbone)</b>       | <b>Gln73* Arg104*</b>                         |
| <b>Asn13</b> | <b>Glu190 Tyr192*</b>           |                                               |
| <b>Pro14</b> |                                 | Leu112*                                       |
| <b>Asn15</b> |                                 |                                               |
| <b>Ile16</b> | Cys187                          |                                               |
| <b>Cys17</b> |                                 |                                               |

(#) interactions seen in  $\leq 3$  pockets.

(**Bold**) Hydrogen bonds (\*) Interactions unique to LsIA/Ls-AChBP complex.

### Supplementary references

- 1 Hopping, G. *et al.* Hydrophobic residues at position 10 of  $\alpha$ -conotoxin PnIA influence subtype selectivity between  $\alpha 7$  and  $\alpha 3\beta 2$  neuronal nicotinic acetylcholine receptors. *Biochemical pharmacology* **91**, 534-542 (2014).
- 2 Lin, B. *et al.* From crystal structure of  $\alpha$ -conotoxin GIC in complex with Ac-AChBP to molecular determinants of its high selectivity for  $\alpha 3\beta 2$  nAChR. *Scientific reports* **6** (2016).
- 3 Beissner, M. *et al.* Efficient binding of 4/7  $\alpha$ -conotoxins to nicotinic  $\alpha 4\beta 2$  receptors is prevented by Arg185 and Pro195 in the  $\alpha 4$  subunit. *Molecular pharmacology* **82**, 711-718 (2012).
- 4 Dutertre, S., Nicke, A. & Lewis, R. J.  $\beta 2$  subunit contribution to 4/7  $\alpha$ -conotoxin binding to the nicotinic acetylcholine receptor. *Journal of Biological Chemistry* **280**, 30460-30468 (2005)
